# Supplementary material for: Identification of predictive factors of the degree of adherence to the Mediterranean diet through machine-learning techniques
Source: PeerJ journal article supplement (doi:10.7717/peerj-cs.287), 2020-07-27
Supplement: Arceo_questionnarie.pdf [file Arceo_questionnarie.pdf]

Patient: \_\_\_\_\_  
History number: \_\_\_\_\_  
Name: \_\_\_\_\_  
Surname: \_\_\_\_\_  
Interviewer: \_\_\_\_\_

**SUBJECTIVE OVERALL  
ASSESSMENT**

**A. BACKGROUND:**

**1. Weight change**

- Overall loss in the past 6 months \_\_\_\_\_ kg, % loss \_\_\_\_\_
- Changes in the last 2 weeks: \_\_\_\_\_ increase  
\_\_\_\_\_ unchanged  
\_\_\_\_\_ decrease

**Change in dietary intake (from normal/usual)**

- No change \_\_\_\_\_
- Change      Duration \_\_\_\_\_ weeks  
Type: \_\_\_\_\_ suboptimal \_\_\_\_\_ solid diet liquid diet  
\_\_\_\_\_ hypocaloric fluids \_\_\_\_\_ fasting

**Gastrointestinal symptoms (lasting > 2 weeks)**

none    \_\_\_\_\_ anorexia    \_\_\_\_\_ nausea    \_\_\_\_\_ vomiting    \_\_\_\_\_ diarrhea

**4. Functional capacity**

- No alteration \_\_\_\_\_
- Alteration      Duration \_\_\_\_\_ weeks  
Intensity: Suboptimal \_\_\_\_\_ work  
\_\_\_\_\_ No work, no bedding  
\_\_\_\_\_ Bed

**5. Basic disease and its relationship to nutritional needs**

Primary diagnosis \_\_\_\_\_

Metabolic demands (degree of stress) None\_\_\_\_\_ Low\_\_\_\_\_

Intermediate\_\_\_ High \_\_\_\_\_

### **B. PHYSICAL EXAMINATION**

For each item: 0: Normal; 1+: mild; 2+: moderate; 3+: severe

- Subcutaneous fat loss (triceps, chest) \_\_\_\_\_
- Loss of muscle mass (quadriceps, deltoids, temporal) \_\_\_\_\_
- Presence of edema (distal, sacral) \_\_\_\_\_
- Presence of ascites \_\_\_\_\_

### **C. VGS CLASSIFICATION** (select one)

**A. Well nourished** (minimal or no intake restriction, minimal changes in function, stable or increased weight.)

**B. Moderately malnourished** (reduced intake, some changes  
and absent or scarce body mass change)

**C. Severely malnourished** (evident declines in intake, function, and body mass)

**DATA COLLECTION NOTEBOOK.**  
**ADULT POPULATION 40 YEARS OLD**  
**AND OVER IN THE MUNICIPALITY**  
**OF CAMBRE**

Patient: \_\_\_\_\_  
History number: \_\_\_\_\_  
Name: \_\_\_\_\_  
Surname: \_\_\_\_\_  
Interviewer: \_\_\_\_\_

**Patient identification variables:**

Date of birth (dd/mm/yyyy):

Sex:

- Male  
 Woman

Place:

Telephone

- Level of studies:  no studies  
 Incomplete 1st degree  
 1st grade (Elementary Baccaureate, EGB)  
 2nd grade (Bachillerato Superior, BUP, FP)  
 University

**Anthropometric variables:**

Weight:

BMI:

Size:

Waist circumference:

Hip perimeter:

Skin folds:

Tricipital:

Subscapular:

Bicipital:

Suprailiac:

Arm perimeter:

Calf perimeter:

Bioimpedance:

Adipose mass:

Bone mass (kg):

Liquid mass:

MTB of activity in Kcal:

Muscle mass:

MTB basal caloric in Kcal:

**DATA COLLECTION NOTEBOOK.  
ADULT POPULATION 40 YEARS OLD  
AND OVER IN THE MUNICIPALITY  
OF CAMBRE**

Patient: \_\_\_\_\_  
History number: \_\_\_\_\_  
Name: \_\_\_\_\_  
Surname: \_\_\_\_\_  
Interviewer: \_\_\_\_\_

**Variables of cardiovascular risk:**

Smoker:

- no
- ex-smoker (patient stopped smoking more than 12 months before entering the study)
- if (patient smokes or has smoked in the last 12 months, at least 1 cigarette or 1 pipe or 1 cigar per day). Fagerström test.

TAS/TAD:

|               | TAD | TAS |
|---------------|-----|-----|
| Measurement 1 |     |     |
| Measurement 2 |     |     |

Analytical:

Previous: date \_\_\_\_\_  no

Current: date \_\_\_\_\_  no (**ask for it**)

EKG:

Hypertrophy of the left ventricle (Sokolow criterion):

if  no

Other findings:

- FA
- AV Lock:
- Extrasystolias
- Ischemia
- Necrosis

**DATA COLLECTION NOTEBOOK.  
ADULT POPULATION 40 YEARS OLD  
AND OVER IN THE MUNICIPALITY  
OF CAMBRE**

Patient: \_\_\_\_\_  
History number: \_\_\_\_\_  
Name: \_\_\_\_\_  
Surname: \_\_\_\_\_  
Interviewer: \_\_\_\_\_

Diseases:

| ILLNESS                                               | HISTORY | TEST CHARLSON |
|-------------------------------------------------------|---------|---------------|
| Myocardial infarction                                 |         |               |
| Heart failure                                         |         |               |
| Peripheral vascular disease                           |         |               |
| Cerebral vascular disease                             |         |               |
| Dementia                                              |         |               |
| Hemiplegia                                            |         |               |
| Chronic lung disease                                  |         |               |
| Connective tissue disease                             |         |               |
| Peptic ulcer                                          |         |               |
| Mild liver disease                                    |         |               |
| Moderate-severe liver disease (ascites and cirrhosis) |         |               |
| Diabetes mellitus                                     |         |               |
| Diabetes with organic affectation                     |         |               |
| Moderate or severe kidney failure                     |         |               |
| Cancer, leukemia, lymphoma                            |         |               |
| Cancer with metastasis                                |         |               |
| AIDS                                                  |         |               |
| HTA                                                   |         |               |
| Alteration of lipids                                  |         |               |
| Other                                                 |         |               |

Medication:

| <b>Category _ medication</b>                | <b>Active ingredient/drug</b> | <b>Dose</b> | <b>Guideline</b> |
|---------------------------------------------|-------------------------------|-------------|------------------|
| <input type="checkbox"/> Oral antidiabetics |                               |             |                  |
| <input type="checkbox"/> Insulin            |                               |             |                  |
| <input type="checkbox"/> Diuretics          |                               |             |                  |
| <input type="checkbox"/> IEC                |                               |             |                  |
| <input type="checkbox"/> ARAS               |                               |             |                  |
| <input type="checkbox"/> Beta-blockers      |                               |             |                  |
| <input type="checkbox"/> Anti-aggregants    |                               |             |                  |
| <input type="checkbox"/> Hypolipemics       |                               |             |                  |
| <input type="checkbox"/> Benzodiazepines    |                               |             |                  |
| <input type="checkbox"/> Neuroleptics       |                               |             |                  |
| <input type="checkbox"/> NSAIDS             |                               |             |                  |
| <input type="checkbox"/> Paracetamol        |                               |             |                  |
| <input type="checkbox"/> Inhalers           |                               |             |                  |
| <input type="checkbox"/> Osteoporosis       |                               |             |                  |
| <input type="checkbox"/> OTHER              |                               |             |                  |

Date of interview (dd/mm/yyyy):

|            |       |           |             |        |
|------------|-------|-----------|-------------|--------|
| Apellidos: |       | Nombre:   |             |        |
| Sexo:      | Edad: | Peso, kg: | Altura, cm: | Fecha: |

Responda a la primera parte del cuestionario indicando la puntuación adecuada para cada pregunta. Sume los puntos correspondientes al cribaje y si la suma es igual o inferior a 11, complete el cuestionario para obtener una apreciación precisa del estado nutricional.

### Cribaje

**A** Ha perdido el apetito? Ha comido menos por faltarle apetito, problemas digestivos, dificultades de masticación o deglución en los últimos 3 meses?  
 0 = ha comido mucho menos  
 1 = ha comido menos  
 2 = ha comido igual

**B** Pérdida reciente de peso (<3 meses)  
 0 = pérdida de peso > 3 kg  
 1 = no lo sabe  
 2 = pérdida de peso entre 1 y 3 kg  
 3 = no ha habido pérdida de peso

**C** Movilidad  
 0 = de la cama al sillón  
 1 = autonomía en el interior  
 2 = sale del domicilio

**D** Ha tenido una enfermedad aguda o situación de estrés psicológico en los últimos 3 meses?  
 0 = sí 2 = no

**E** Problemas neuropsicológicos  
 0 = demencia o depresión grave  
 1 = demencia moderada  
 2 = sin problemas psicológicos

**F** Índice de masa corporal (IMC = peso / (talla)<sup>2</sup> en kg/m<sup>2</sup>)  
 0 = IMC < 19  
 1 = 19 ≤ IMC < 21  
 2 = 21 ≤ IMC < 23  
 3 = IMC ≥ 23.

**Evaluación del cribaje** (subtotal máx. 14 puntos)

12-14 puntos: estado nutricional normal  
 8-11 puntos: riesgo de malnutrición  
 0-7 puntos: malnutrición

Para una evaluación más detallada, continúe con las preguntas G-R

### Evaluación

**G** El paciente vive independiente en su domicilio?  
 1 = sí 0 = no

**H** Toma más de 3 medicamentos al día?  
 0 = sí 1 = no

**I** Úlceras o lesiones cutáneas?  
 0 = sí 1 = no

**J** Cuántas comidas completas toma al día?  
 0 = 1 comida  
 1 = 2 comidas  
 2 = 3 comidas

**K** Consume el paciente

- productos lácteos al menos una vez al día?  sí  no
- huevos o legumbres 1 o 2 veces a la semana?  sí  no
- carne, pescado o aves, diariamente?  sí  no

0.0 = 0 o 1 síes  
 0.5 = 2 síes  
 1.0 = 3 síes

**L** Consume frutas o verduras al menos 2 veces al día?  
 0 = no 1 = sí

**M** Cuántos vasos de agua u otros líquidos toma al día? (agua, zumo, café, té, leche, vino, cerveza...)  
 0.0 = menos de 3 vasos  
 0.5 = de 3 a 5 vasos  
 1.0 = más de 5 vasos

**N** Forma de alimentarse  
 0 = necesita ayuda  
 1 = se alimenta solo con dificultad  
 2 = se alimenta solo sin dificultad

**O** Se considera el paciente que está bien nutrido?  
 0 = malnutrición grave  
 1 = no lo sabe o malnutrición moderada  
 2 = sin problemas de nutrición

**P** En comparación con las personas de su edad, cómo encuentra el paciente su estado de salud?  
 0.0 = peor  
 0.5 = no lo sabe  
 1.0 = igual  
 2.0 = mejor

**Q** Circunferencia braquial (CB en cm)  
 0.0 = CB < 21  
 0.5 = 21 ≤ CB ≤ 22  
 1.0 = CB > 22

**R** Circunferencia de la pantorrilla (CP en cm)  
 0 = CP < 31  
 1 = CP ≥ 31

**Evaluación** (máx. 18 puntos)

**Cribaje**

**Evaluación global** (máx. 30 puntos)

**Evaluación del estado nutricional**

De 24 a 30 puntos  estado nutricional normal  
 De 17 a 23.5 puntos  riesgo de malnutrición  
 Menos de 17 puntos  malnutrición

Re: Vellas B, Villars H, Abellan G, et al. Overview of the MNA® - Its History and Challenges. J Nut Health Aging 2006 ; 10 : 456-465.  
 Rubenstein LZ, Harker JO, Salva A, Gulgoz Y, Vellas B. Screening for Undernutrition in Geriatric Practice : Developing the Short-Form Mini Nutritional Assessment (MNA-SF). J. Geront 2001 ; 56A : M366-377.  
 Gulgoz Y. The Mini-Nutritional Assessment (MNA®) Review of the Literature - What does it tell us? J Nutr Health Aging 2006 ; 10 : 466-487.  
 © Société des Produits Nestlé, S.A., Vevey, Switzerland, Trademark Owners  
 © Nestlé, 1994, Revision 2005. N67200 12/99 10M  
 Para más información: [www.mna-elderly.com](http://www.mna-elderly.com)

**Eating Disorder Inventory  
Subscale  
(EDI-IC): bodily dissatisfaction**

Patient: \_\_\_\_\_  
 History number: \_\_\_\_\_  
 Name: \_\_\_\_\_  
 Surname: \_\_\_\_\_  
 Interviewer: \_\_\_\_\_

Instructions

Below you will find some sentences that are commonly used to measure the patient's dissatisfaction with the general shape of their body or with that of those parts of their body that most concern those who suffer from eating disorders (stomach, hips, thighs, buttocks ...). Mark with an X what best indicates how you feel right now.

|                                               | Always | Almost<br>always | Often | Someti<br>mes | Almos<br>t never | Never |
|-----------------------------------------------|--------|------------------|-------|---------------|------------------|-------|
| 1. I think my stomach is too big              |        |                  |       |               |                  |       |
| 2. I think my thighs are too thick.           |        |                  |       |               |                  |       |
| 3. I think my stomach is the right size.      |        |                  |       |               |                  |       |
| 4. I'm satisfied with my figure.              |        |                  |       |               |                  |       |
| 5. I like the shape of my ass.                |        |                  |       |               |                  |       |
| 6. I think my hips are too wide.              |        |                  |       |               |                  |       |
| 7. I think the size of my thighs is adequate. |        |                  |       |               |                  |       |
| 8. I think my ass is too big.                 |        |                  |       |               |                  |       |
| 9. I think my hips are the right size.        |        |                  |       |               |                  |       |



**Eating Disorder Inventory  
Subscale  
(EDI-O):  
obsession with thinnessw**

Instructions

The elements of this scale refer to concern for weight, diets and fear of gaining weight. Mark with an X what best indicates how you feel right now.

|                                                                         | Always | Almost<br>always | Often | Someti<br>mes | Almos<br>t never | Never |
|-------------------------------------------------------------------------|--------|------------------|-------|---------------|------------------|-------|
| I eat sweets and carbohydrates without feeling nervous.                 |        |                  |       |               |                  |       |
| 2. I'm thinking of going on a diet                                      |        |                  |       |               |                  |       |
| 3. I feel very guilty when I eat too much                               |        |                  |       |               |                  |       |
| 4. I'm terrified of the idea of getting fat.                            |        |                  |       |               |                  |       |
| 5. I exaggerate or overemphasize weight                                 |        |                  |       |               |                  |       |
| 6. I'm obsessed with the desire to be thinner.                          |        |                  |       |               |                  |       |
| 7. If I gain a kilo of weight, I'm afraid I'll continue to gain weight. |        |                  |       |               |                  |       |

**Subjective perception of weight:**

I consider my weight to be:

- A) higher than normal
- B) normal
- C) lower than normal

**DATA COLLECTION NOTEBOOK.  
ADULT POPULATION 65 YEARS OLD  
AND OVER IN THE MUNICIPALITY  
OF CAMBRE**

Patient: \_\_\_\_\_  
History number: \_\_\_\_\_  
Name: \_\_\_\_\_  
Surname: \_\_\_\_\_  
Interviewer: \_\_\_\_\_

**Patient identification variables:**

Date of birth (dd/mm/yyyy):

Sex:

Male

Woman

Place:

Telephone

Level of studies:  no studies

Incomplete 1st degree

1st grade (Elementary Baccaureate, EGB)

2nd grade (Bachillerato Superior, BUP, FP)

University

**Anthropometric variables:**

Weight:

BMI:

Size:

Waist circumference:

Hip perimeter:

Skin folds:

Tricipital:

Subscapular:

Bicipital:

Suprailiac:

Arm perimeter:

Calf perimeter:

Bioimpedance:

Adipose mass:

Bone mass (kg):

Liquid mass:

MTB of activity in Kcal:

Muscle mass:

MTB basal caloric in Kcal:

**DATA COLLECTION NOTEBOOK.  
ADULT POPULATION 65 YEARS OLD  
AND OVER IN THE MUNICIPALITY  
OF CAMBRE**

Patient: \_\_\_\_\_  
History number: \_\_\_\_\_  
Name: \_\_\_\_\_  
Surname: \_\_\_\_\_  
Interviewer: \_\_\_\_\_

**Variables of cardiovascular risk:**

Smoker:

- no
- ex-smoker (patient stopped smoking more than 12 months before entering the study)
- if (patient smokes or has smoked in the last 12 months, at least 1 cigarette or 1 pipe or 1 cigar per day). Fagerström test.

TAS/TAD:

|               | TAD | TAS |
|---------------|-----|-----|
| Measurement 1 |     |     |
| Measurement 2 |     |     |

Analytical:

Previous:                    date \_\_\_\_\_                     no  
Current:                    date \_\_\_\_\_                     no (**ask for it**)

Physical activity (more than 30 minutes of moderate-intense physical activity more than 5 days a week):

if                     no

EKG:

Hypertrophy of the left ventricle (Sokolow criterion):

if                     no

Other findings:

- FA
- AV Lock:
- Extrasystolias
- Ischemia
- Necrosis

**DATA COLLECTION NOTEBOOK.  
ADULT POPULATION 65 YEARS OLD  
AND OVER IN THE MUNICIPALITY  
OF CAMBRE**

Patient: \_\_\_\_\_  
History number: \_\_\_\_\_  
Name: \_\_\_\_\_  
Surname: \_\_\_\_\_  
Interviewer: \_\_\_\_\_

Diseases:

| ILLNESS                                               | HISTORY | TEST CHARLSON |
|-------------------------------------------------------|---------|---------------|
| Myocardial infarction                                 |         |               |
| Heart failure                                         |         |               |
| Peripheral vascular disease                           |         |               |
| Cerebral vascular disease                             |         |               |
| Dementia                                              |         |               |
| Hemiplegia                                            |         |               |
| Chronic lung disease                                  |         |               |
| Connective tissue disease                             |         |               |
| Peptic ulcer                                          |         |               |
| Mild liver disease                                    |         |               |
| Moderate-severe liver disease (ascites and cirrhosis) |         |               |
| Diabetes mellitus                                     |         |               |
| Diabetes with organic affectation                     |         |               |
| Moderate or severe kidney failure                     |         |               |
| Cancer, leukemia, lymphoma                            |         |               |
| Cancer with metastasis                                |         |               |
| AIDS                                                  |         |               |
| HTA                                                   |         |               |
| Alteration of lipids                                  |         |               |
| Other                                                 |         |               |

Medication:

| <b>Category _ medication</b>                | <b>Active ingredient/drug</b> | <b>Dose</b> | <b>Guideline</b> |
|---------------------------------------------|-------------------------------|-------------|------------------|
| <input type="checkbox"/> Oral antidiabetics |                               |             |                  |
| <input type="checkbox"/> Insulin            |                               |             |                  |
| <input type="checkbox"/> Diuretics          |                               |             |                  |
| <input type="checkbox"/> IEC                |                               |             |                  |
| <input type="checkbox"/> ARAS               |                               |             |                  |
| <input type="checkbox"/> Beta-blockers      |                               |             |                  |
| <input type="checkbox"/> Anti-aggregants    |                               |             |                  |
| <input type="checkbox"/> Hypolipemics       |                               |             |                  |
| <input type="checkbox"/> Benzodiazepines    |                               |             |                  |
| <input type="checkbox"/> Neuroleptics       |                               |             |                  |
| <input type="checkbox"/> NSAIDS             |                               |             |                  |
| <input type="checkbox"/> Paracetamol        |                               |             |                  |
| <input type="checkbox"/> Inhalers           |                               |             |                  |
| <input type="checkbox"/> Osteoporosis       |                               |             |                  |
| <input type="checkbox"/> OTHER              |                               |             |                  |

Date of interview (dd/mm/yyyy):
